# Supplementary material for: TGF‐β1 secreted by Tregs in lymph nodes promotes breast cancer malignancy via up‐regulation of IL‐17RB
Source: PubMed Central journal article supplement (PMC5709760; doi:10.15252/emmm.201606914), 2017-10-09

Figure 6B  
Boxes highlight lanes used in the figure

Il-17rb

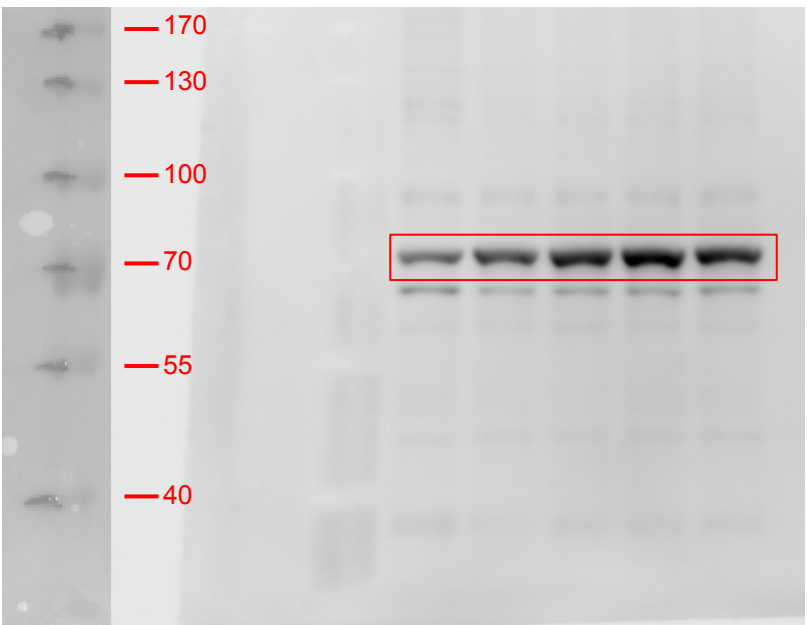

$\alpha$ -tubulin

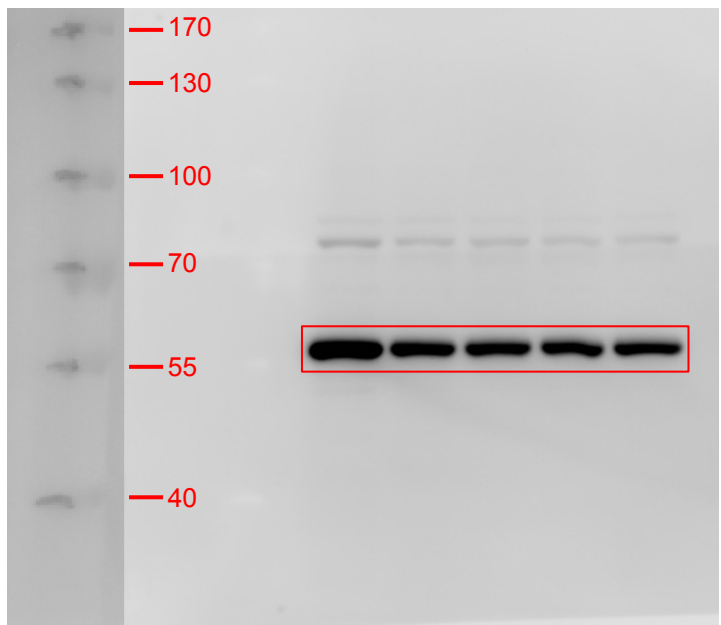

Figure 6C  
Boxes highlight lanes used in the figure

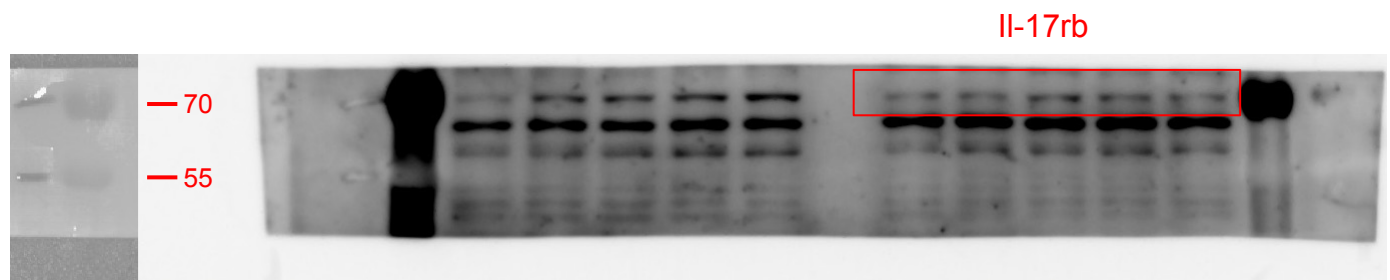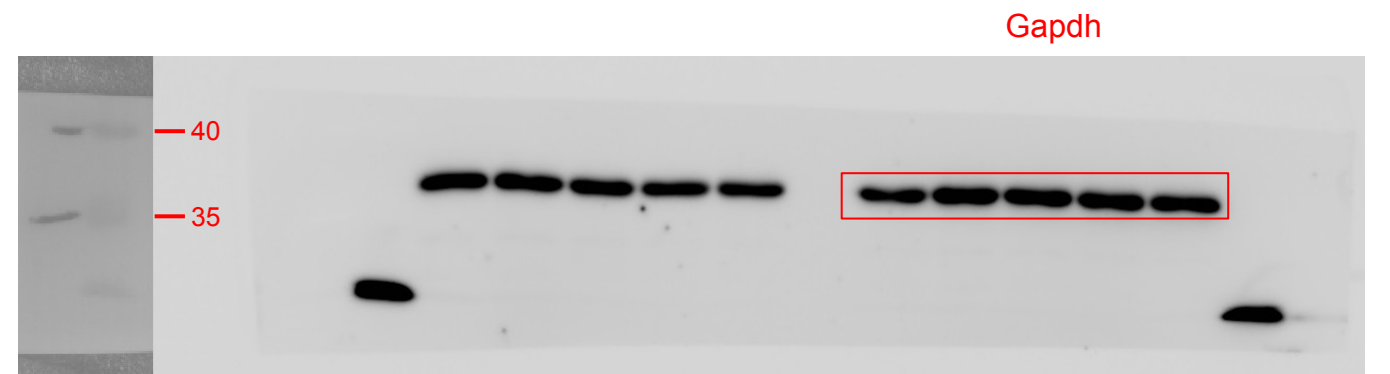

Figure 6D  
Boxes highlight lanes used in the figure

Il-17rb

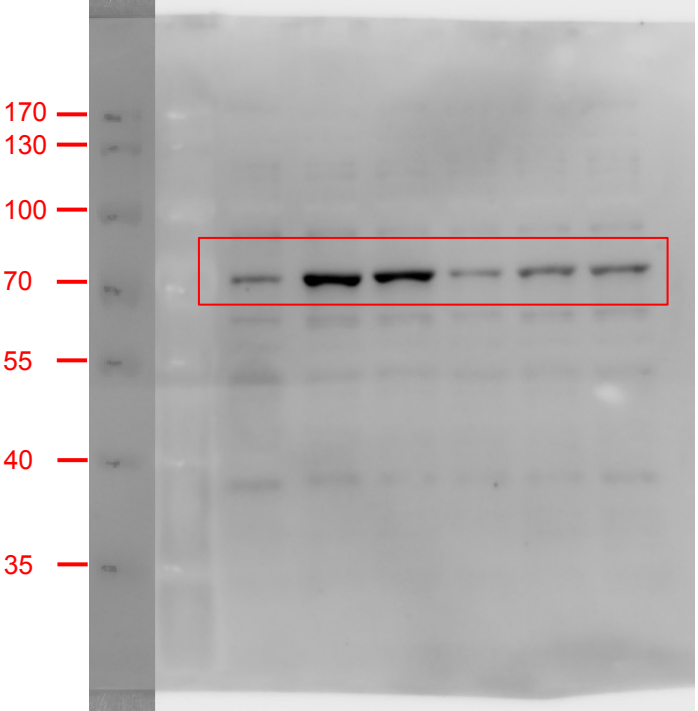

Gapdh

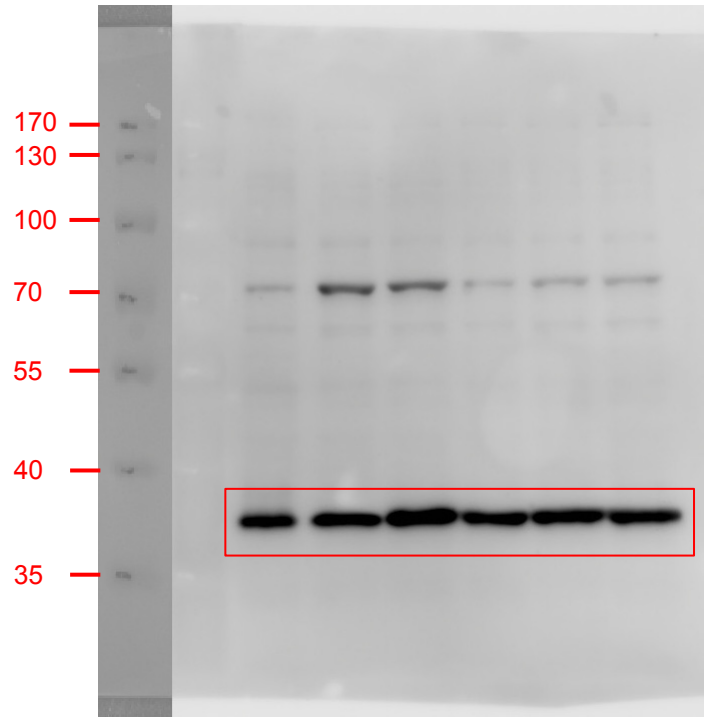

Tgfbr1

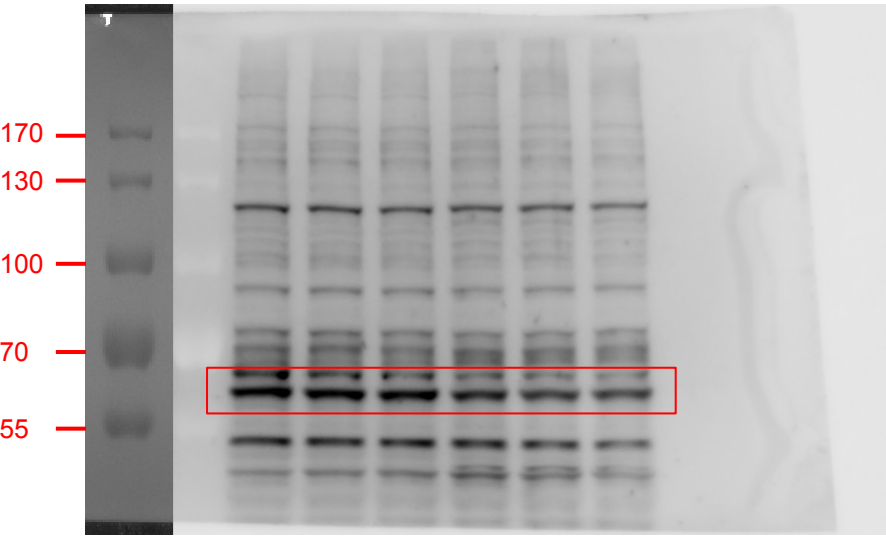

Gapdh

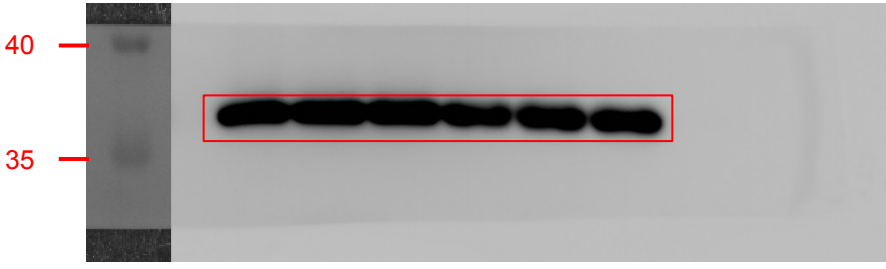

Figure 6F  
Boxes highlight lanes used in the figure

Il-17rb

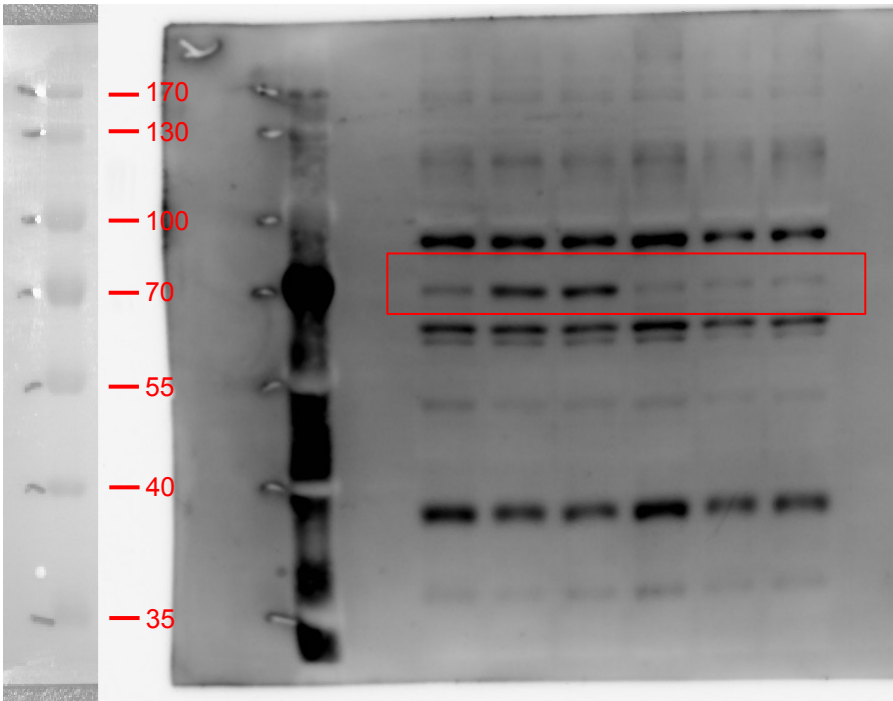

Smad2

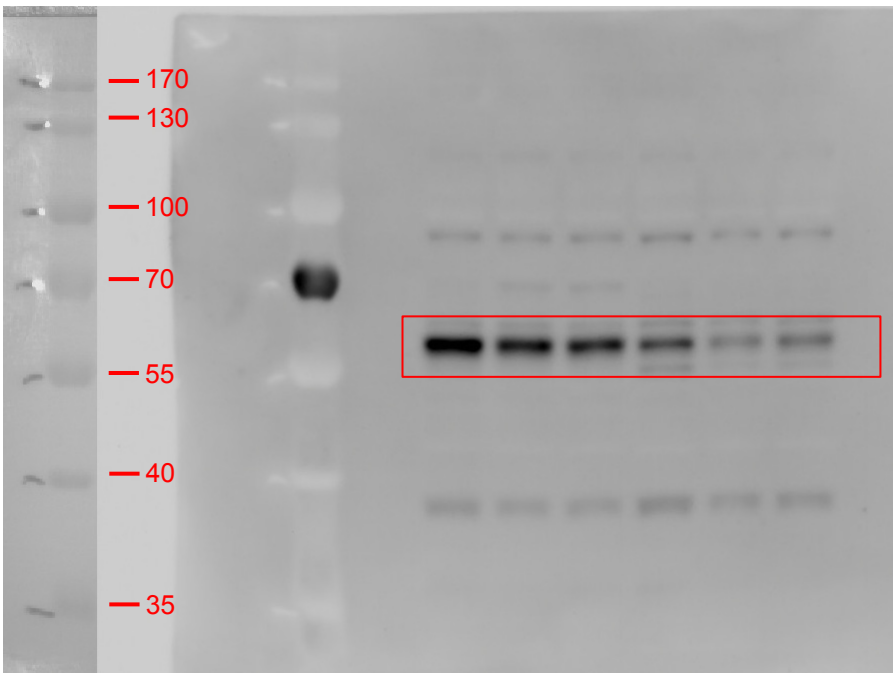

Figure 6F  
Boxes highlight lanes used in the figure

Gapdh

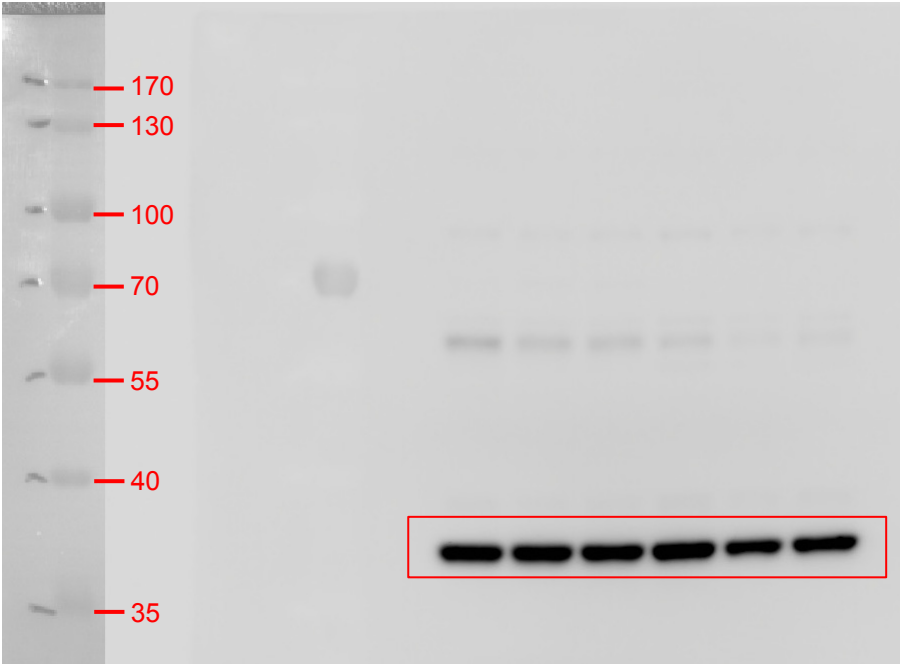

Figure 6G  
Boxes highlight lanes used in the figure

Il-17rb

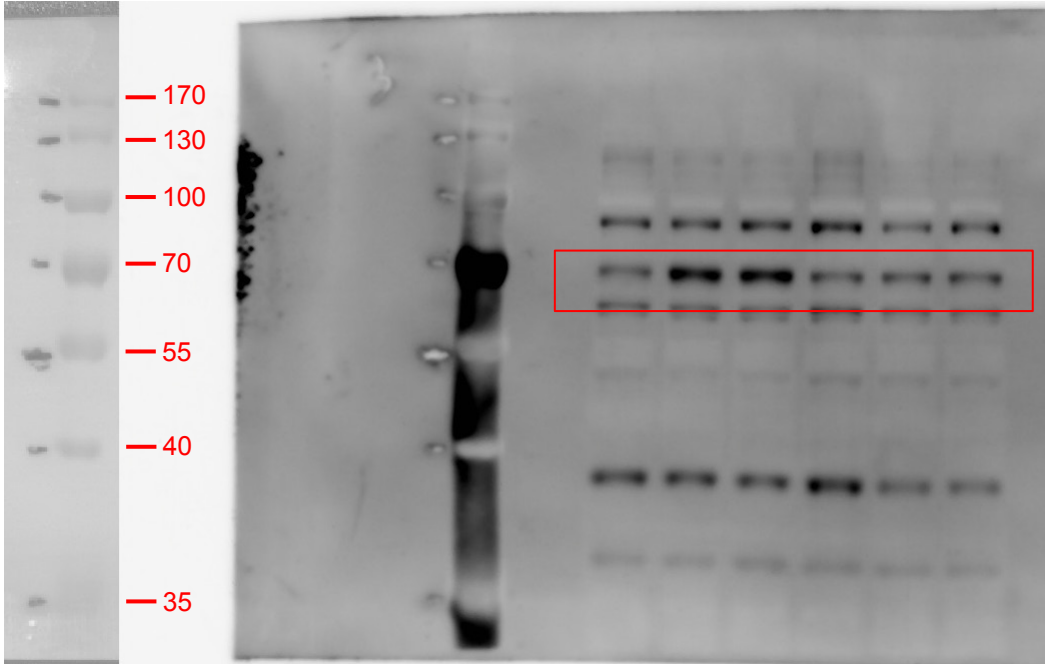

Smad3

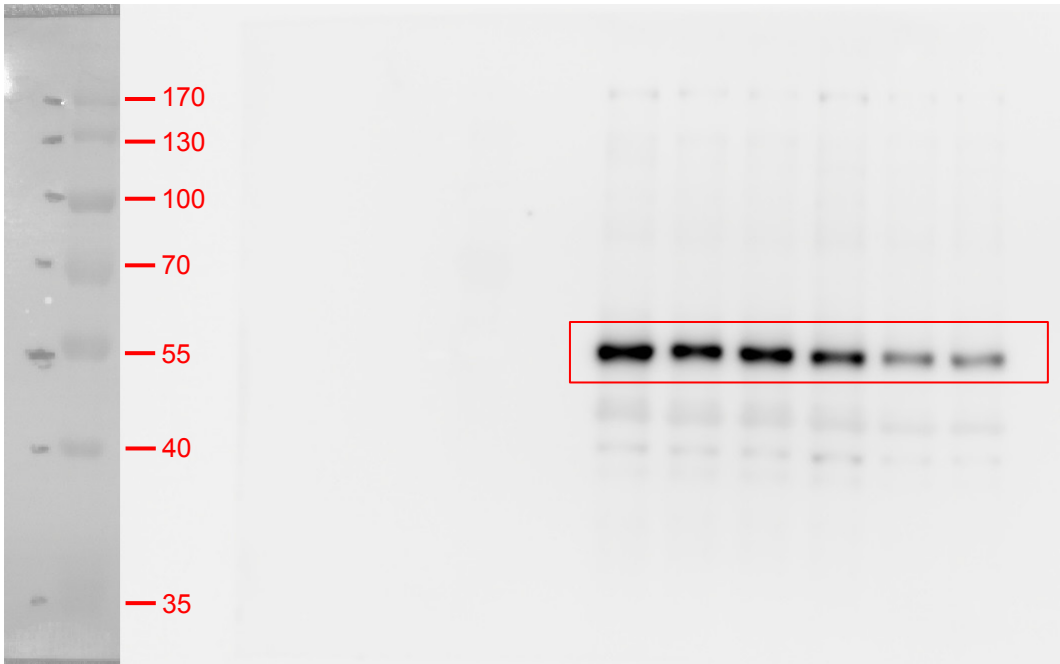

Figure 6G  
Boxes highlight lanes used in the figure

Gapdh

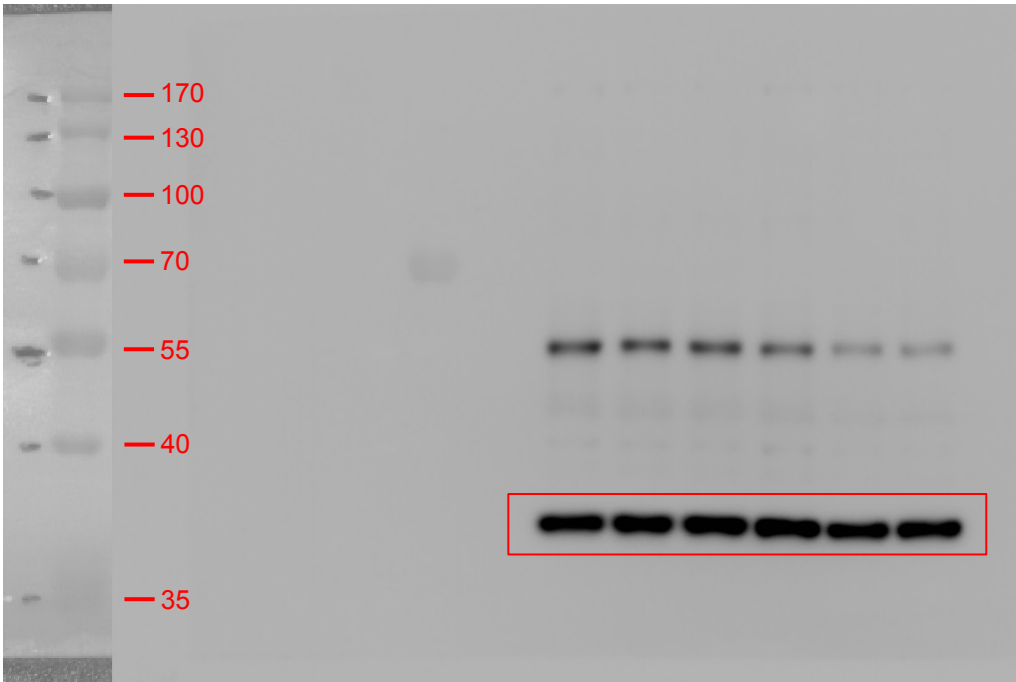

Figure 6H  
Boxes highlight lanes used in the figure

Il-17rb

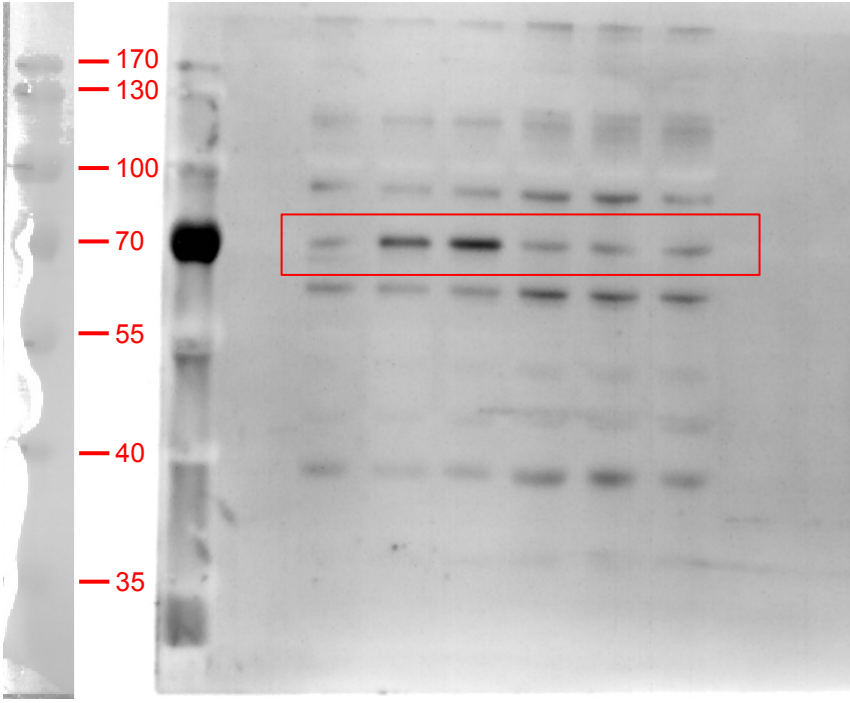

Smad4

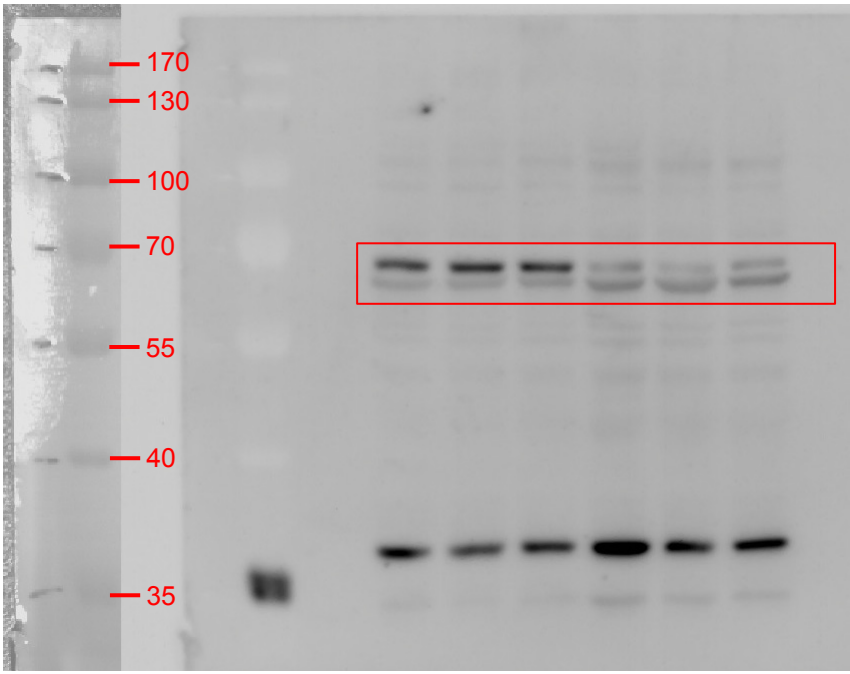



Figure 6H  
Boxes highlight lanes used in the figure

Gapdh

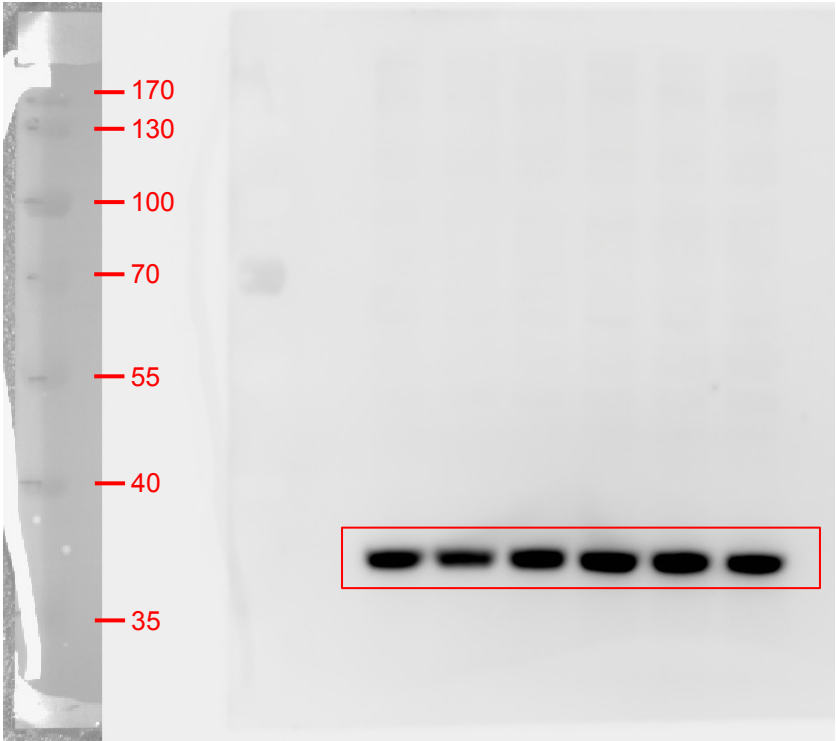

Figure 6I  
Boxes highlight lanes used in the figure

NF- $\kappa$ B p65

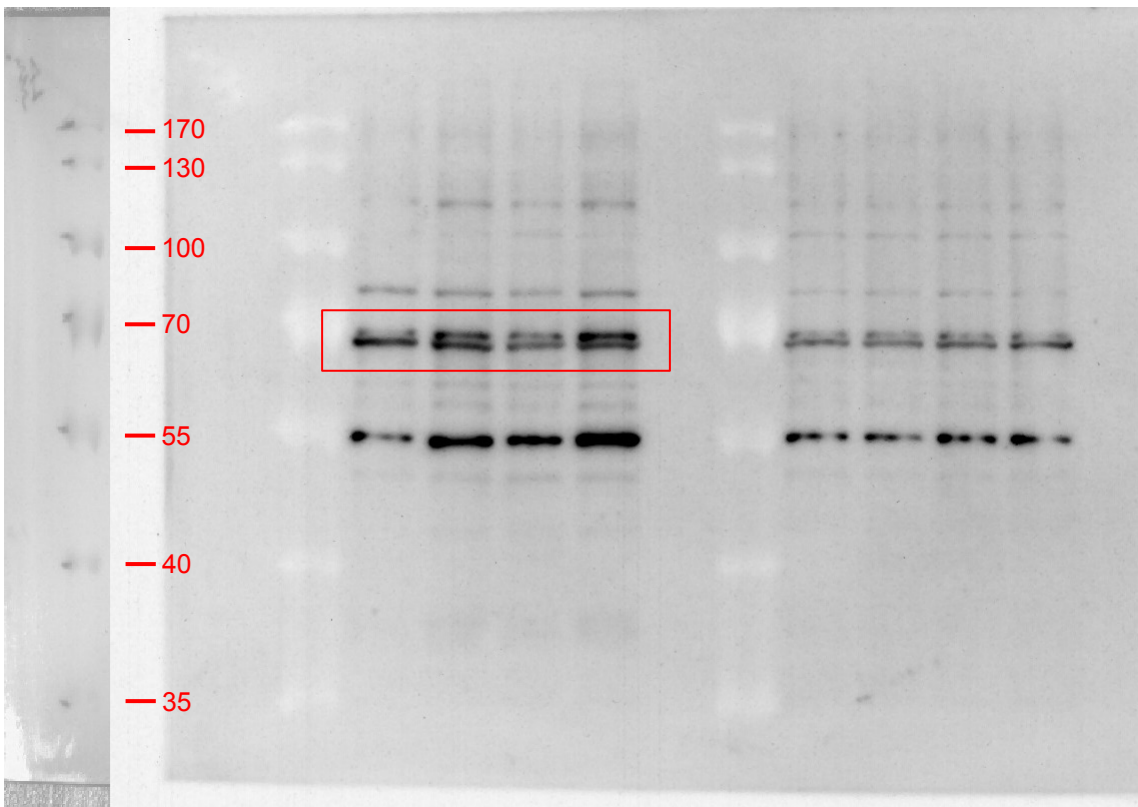

p84

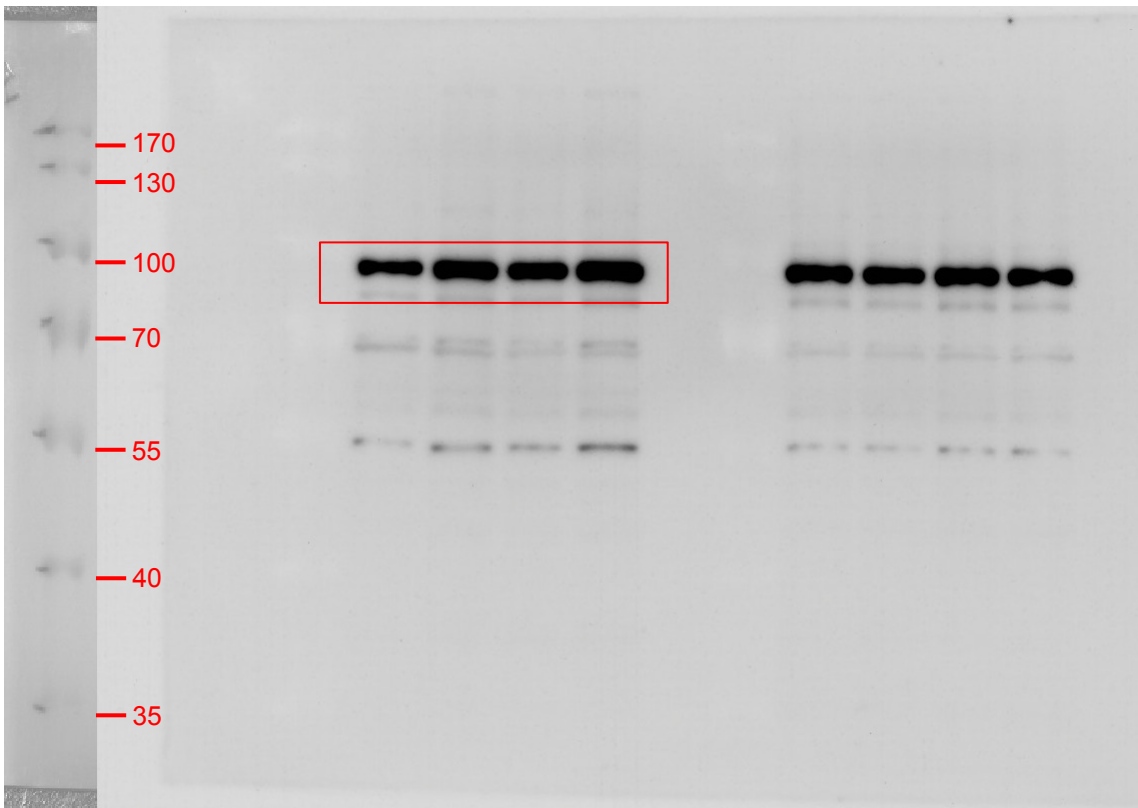

Figure 6J  
Boxes highlight lanes used in the figure

NF-κB p65

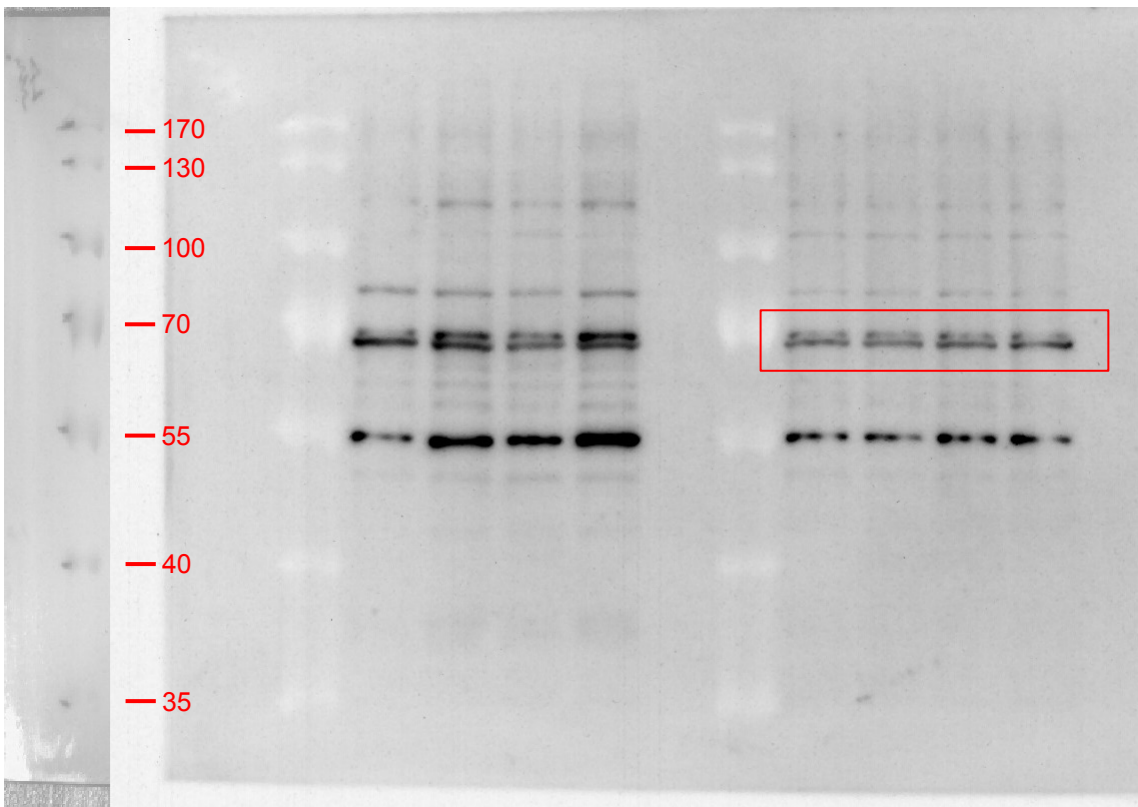

p84

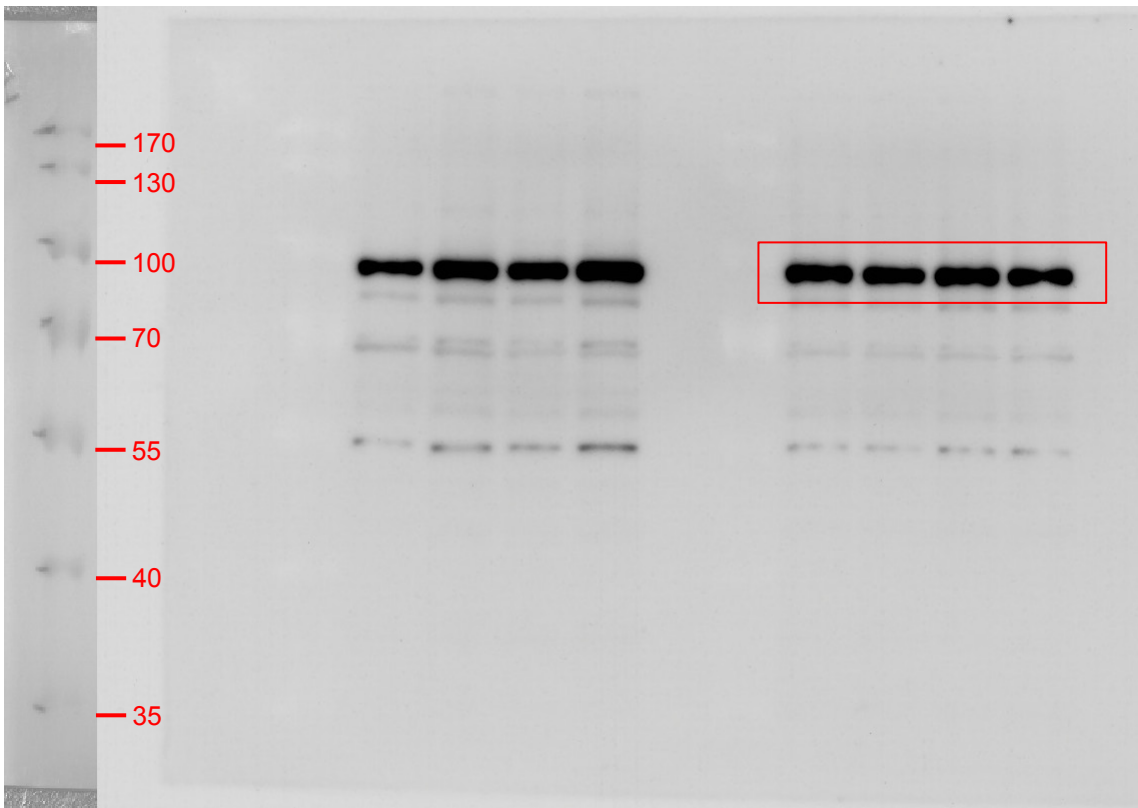

Supplement: EMMM-9-1660-s008.pdf [file EMMM-9-1660-s008.pdf]
