# Supplementary material for: TGF‐β1 secreted by Tregs in lymph nodes promotes breast cancer malignancy via up‐regulation of IL‐17RB
Source: PubMed Central journal article supplement (PMC5709760; doi:10.15252/emmm.201606914), 2017-10-09

Figure 3C  
Boxes highlight lanes used in the figure

Il-17rb

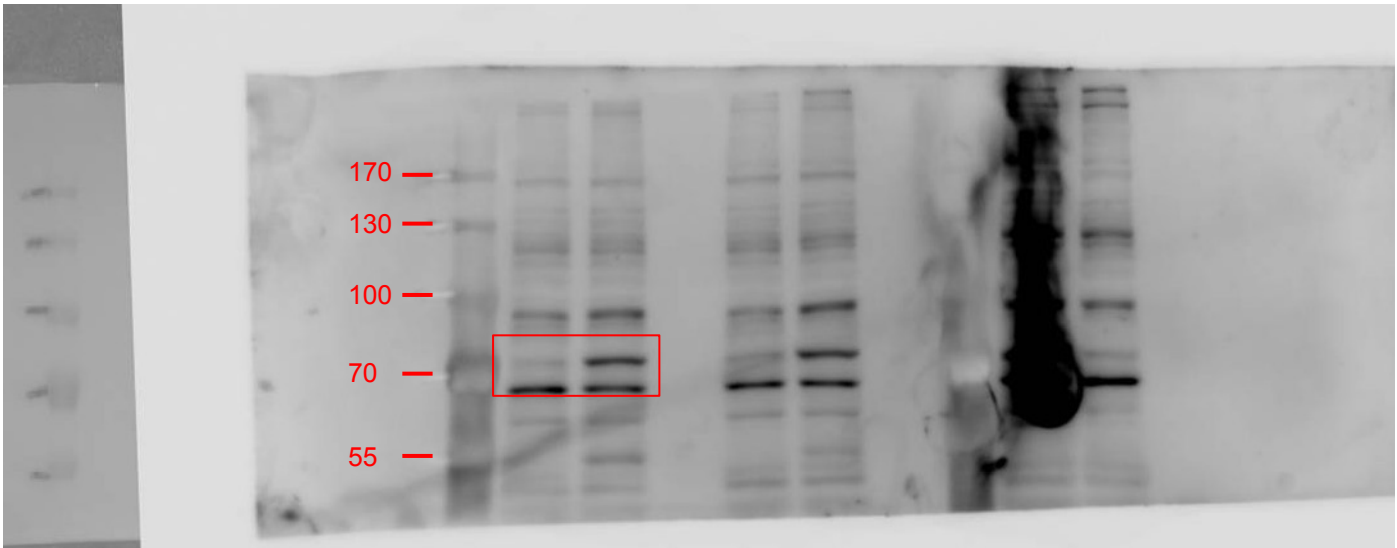

Gapdh

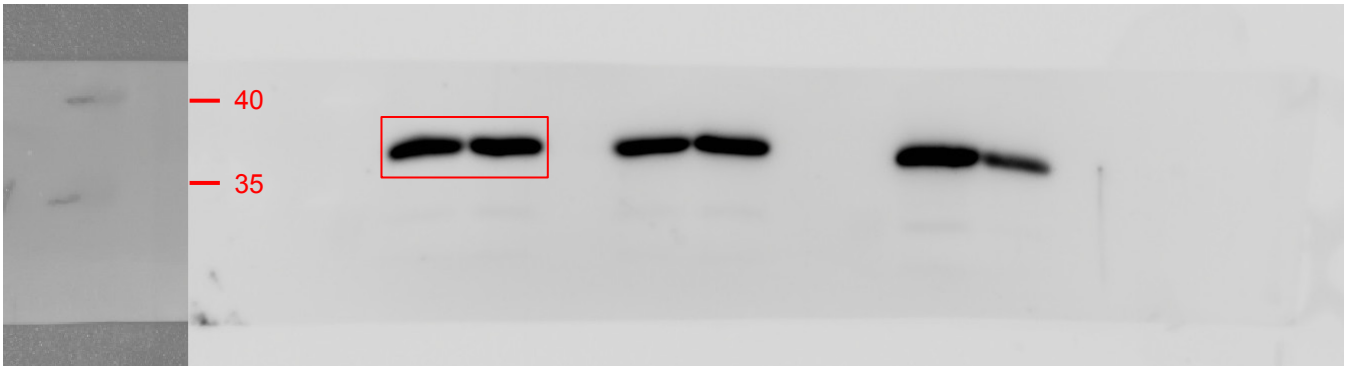

Figure 3D  
Boxes highlight lanes used in the figure

Gpr56

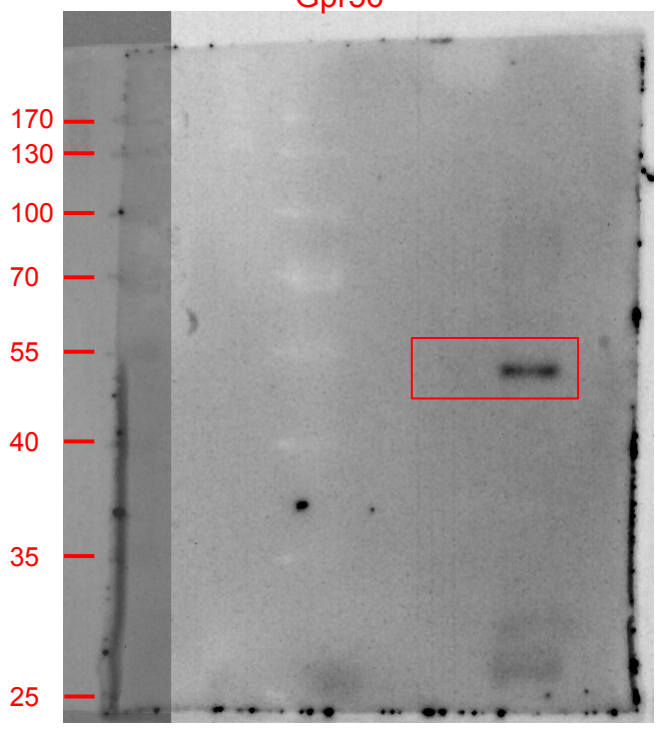

Gapdh

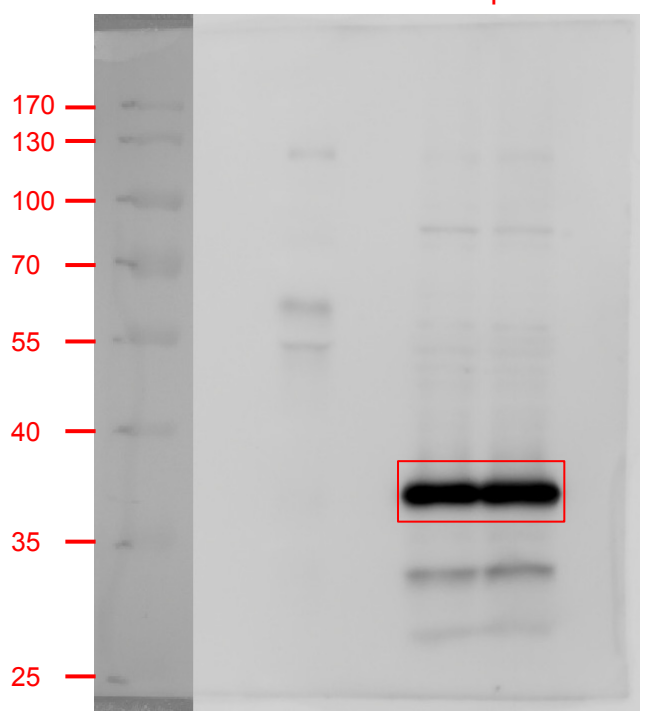

Scara5

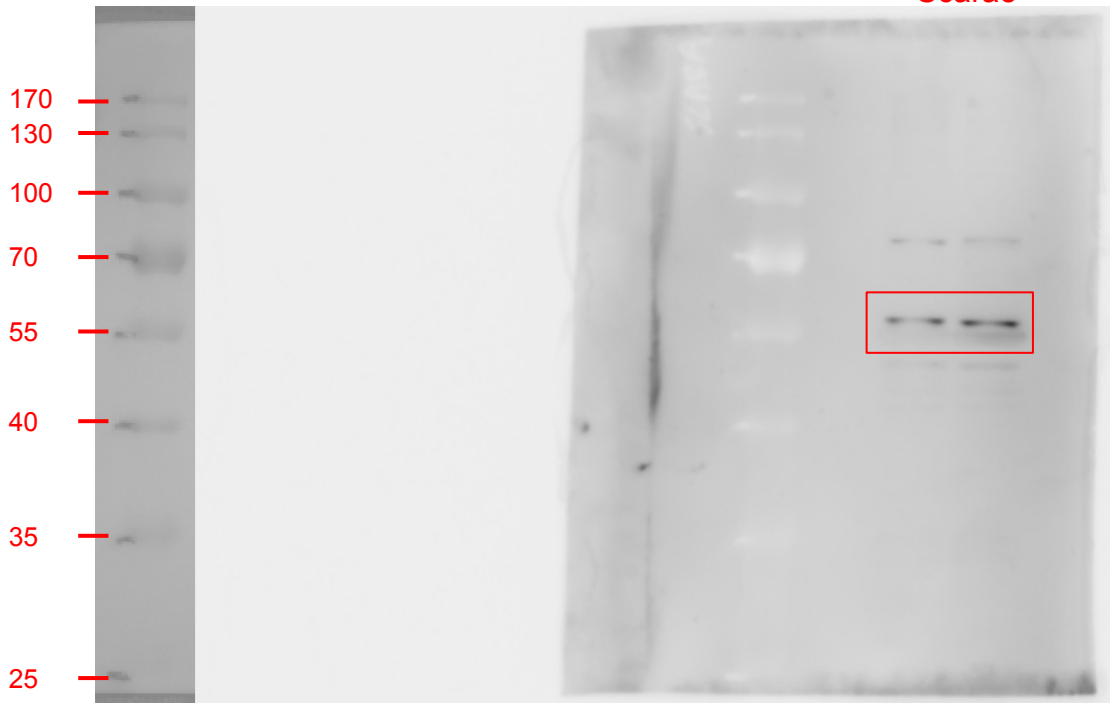

Figure 3E  
Boxes highlight lanes used in the figure

Il-17rb

170 —  
130 —  
100 —  
70 —  
55 —  
40 —  
35 —

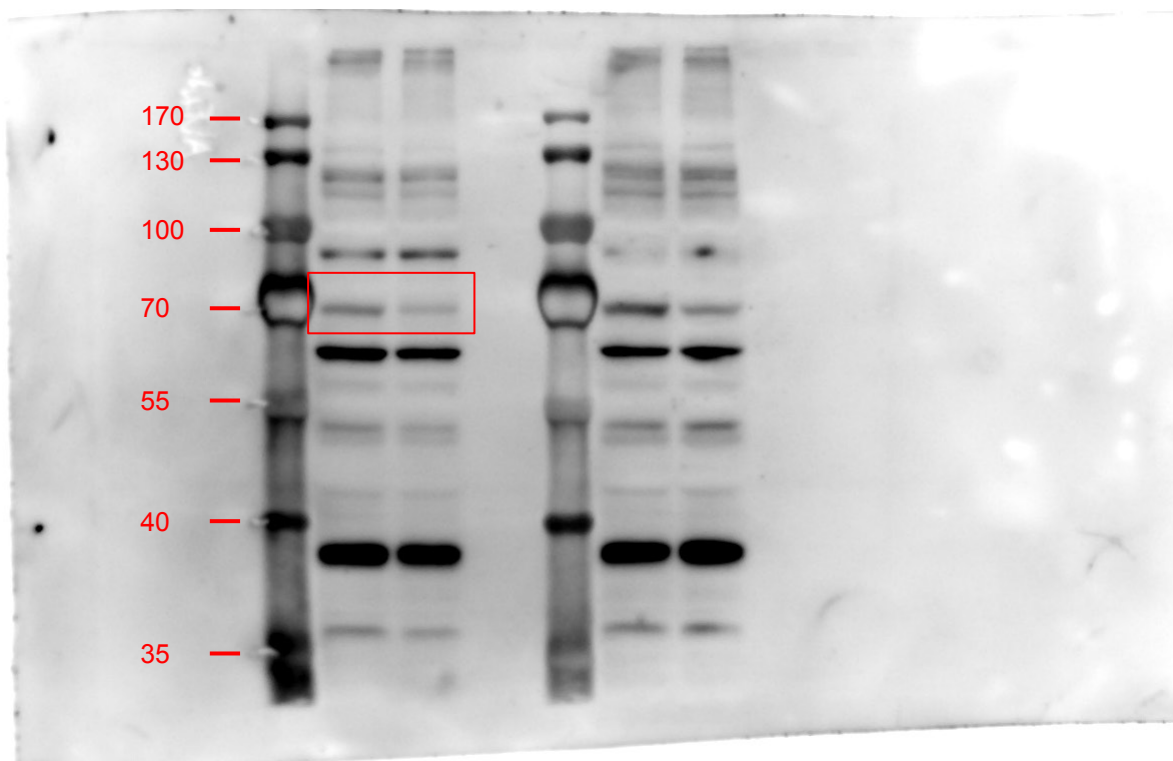

Gapdh

170 —  
130 —  
100 —  
70 —  
55 —  
40 —  
35 —

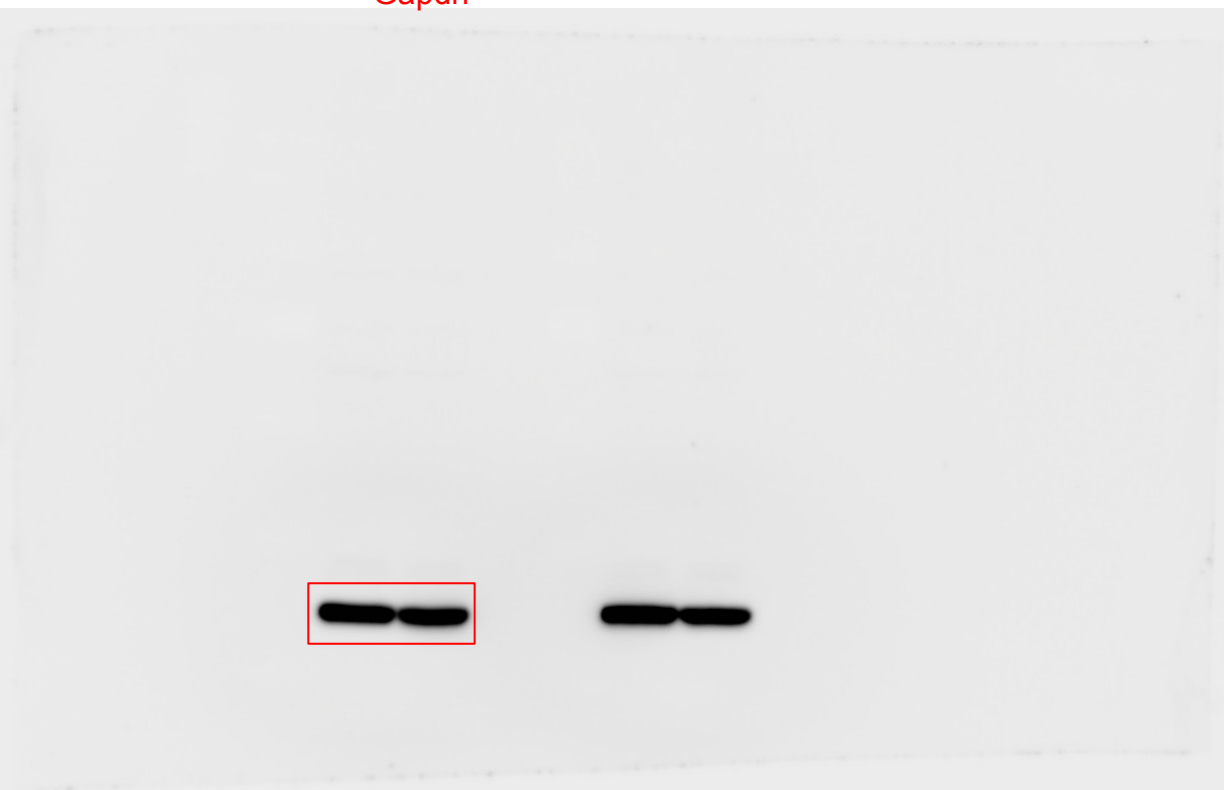

Figure 3E

Boxes highlight lanes used in the figure

Scara5

Gapdh

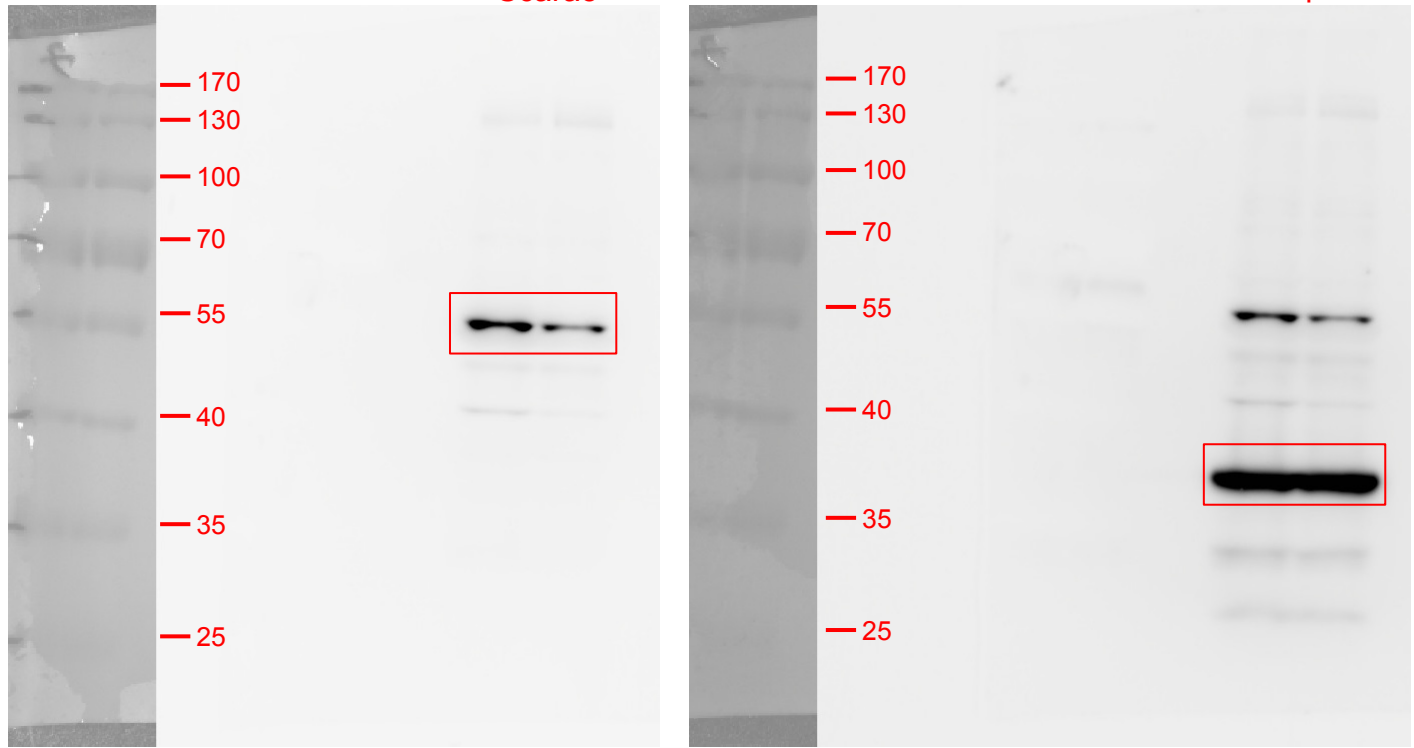

Figure 3G

Boxes highlight lanes used in the figure

Il-17rb

Gapdh

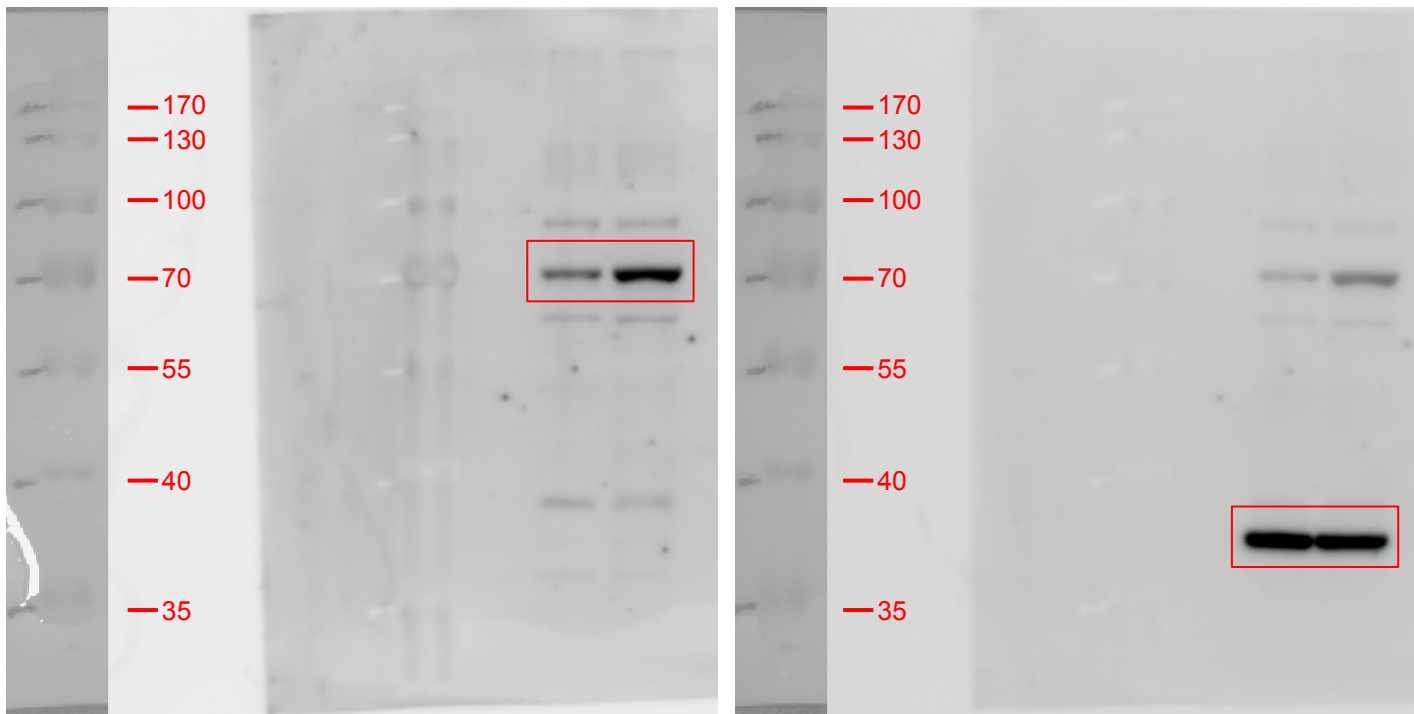

Figure 3I  
Boxes highlight lanes used in the figure

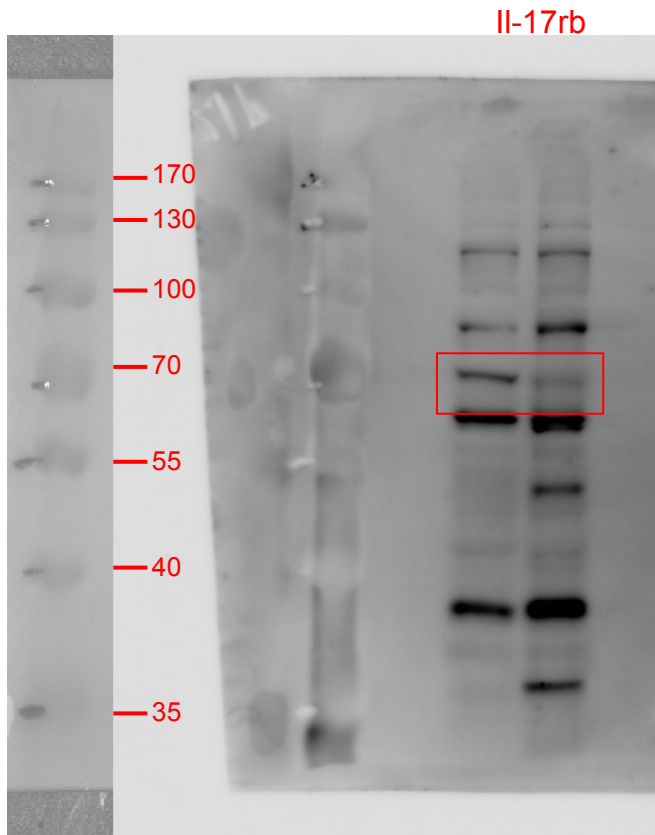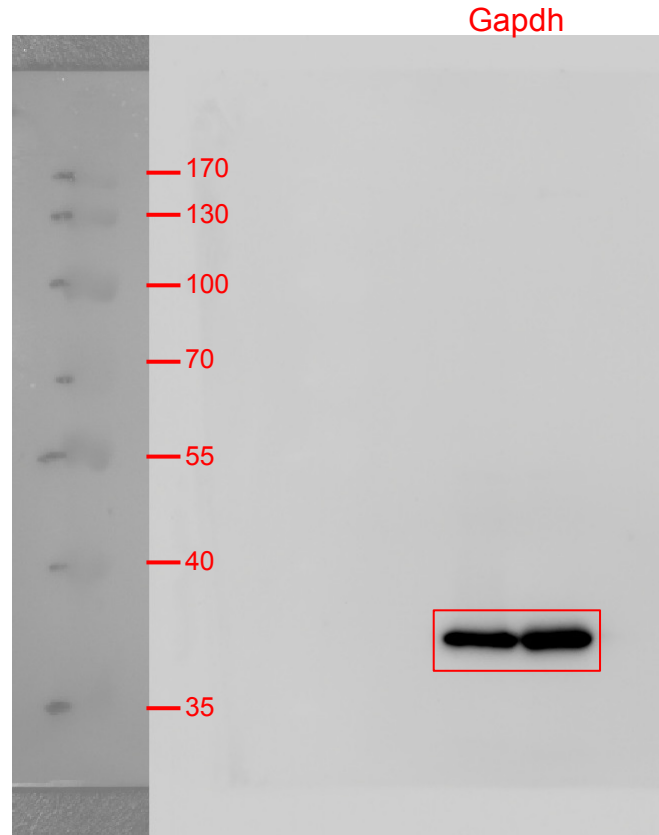

Supplement: EMMM-9-1660-s005.pdf [file EMMM-9-1660-s005.pdf]
