# Supplementary material for: TGF‐β1 secreted by Tregs in lymph nodes promotes breast cancer malignancy via up‐regulation of IL‐17RB
Source: PubMed Central journal article supplement (PMC5709760; doi:10.15252/emmm.201606914), 2017-10-09

Figure 4C  
Boxes highlight lanes used in the figure

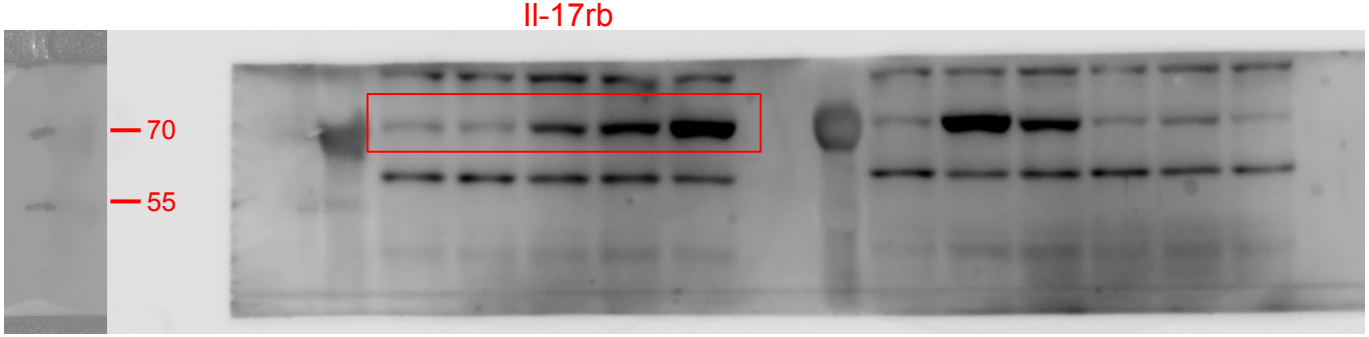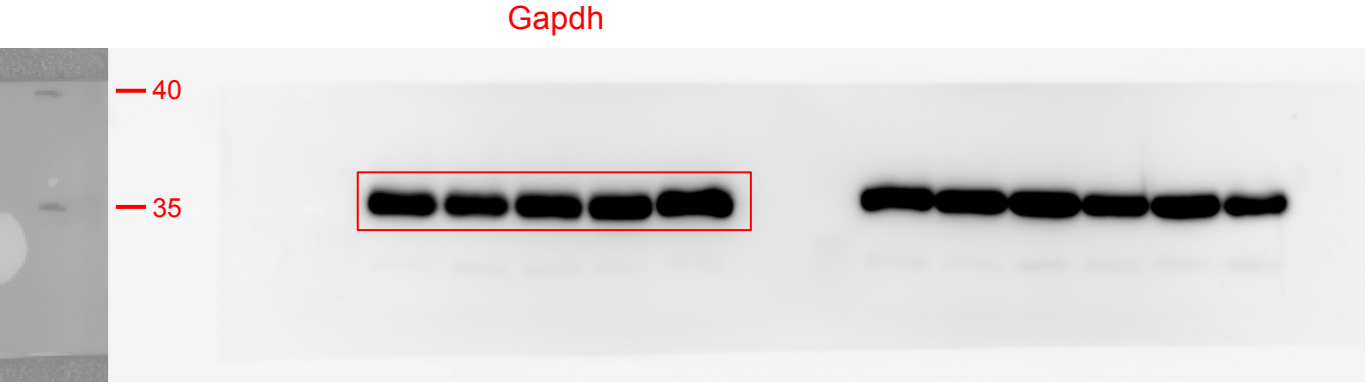

Figure 4F  
Boxes highlight lanes used in the figure

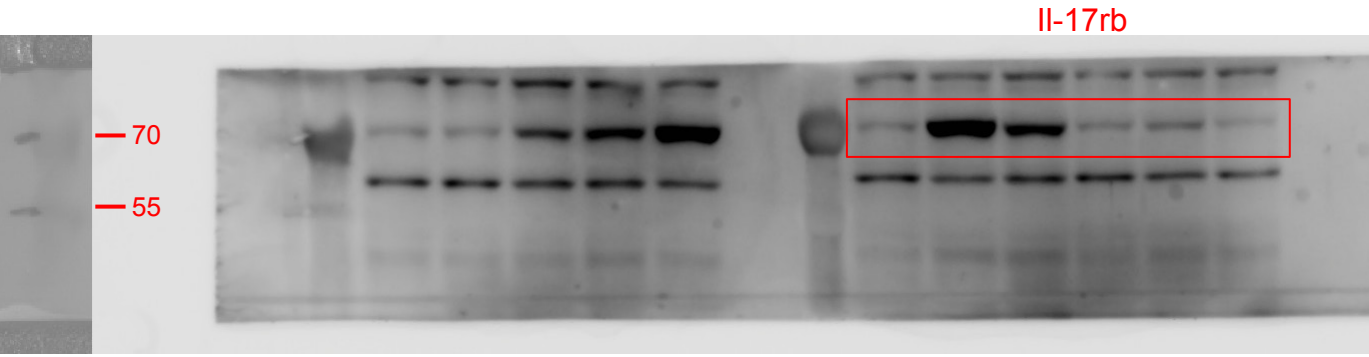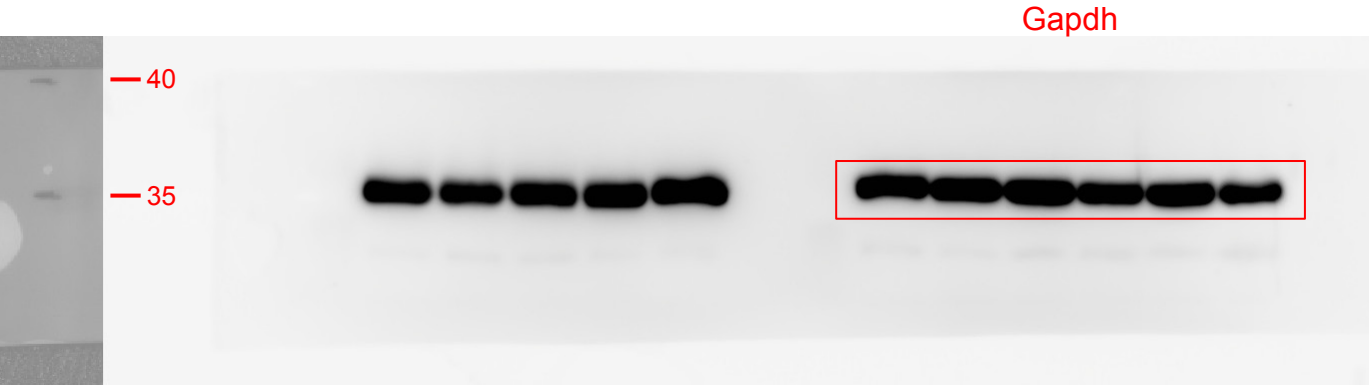

Supplement: EMMM-9-1660-s006.pdf [file EMMM-9-1660-s006.pdf]
