# Supplementary material for: TGF‐β1 secreted by Tregs in lymph nodes promotes breast cancer malignancy via up‐regulation of IL‐17RB
Source: EMBO Mol Med. 2017 Oct 9;9(12):1660–80. doi: 10.15252/emmm.201606914 (PMC5709760; doi:10.15252/emmm.201606914)
Supplement: Supplementary file 1 — Appendix [file EMMM-9-1660-s001.pdf]

## **Appendix**

**Table of content**

**Appendix Figure S1**

**Appendix Figure S2**

**Appendix Figure S3**

**Appendix Figure S4**

**Appendix Figure S5**

**Appendix Figure S6**

**Appendix Figure S7**

**Appendix Table S1**

**Appendix Table S2**

**Appendix Table S3**

## Appendix Figure S1

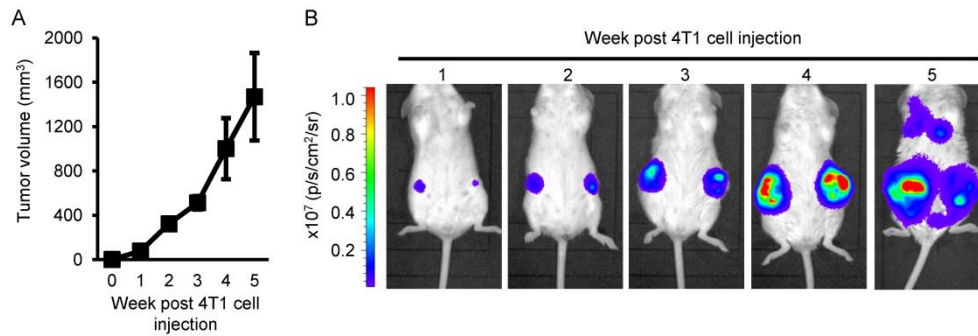

### Appendix Figure S1. Kinetics of distant organ metastasis in 4T1 tumor-bearing mice.

(A) Tumor growth curve in BALB/c mice injected with 4T1 cells.  $1 \times 10^6$  4T1 cells were injected into the fourth mammary fat pad on the both side and the tumor volumes were evaluated weekly.

(B) Representative IVIS images of the 4T1 tumor-bearing mice. The bioluminescent signal (pseudocolor) was recorded as photons per second per centimeter squared per steradian (p/s/cm<sup>2</sup>/sr). The luminescent image was overlaid on the photographic image.

Data information: In (A), data are presented as mean  $\pm$  SD (n = 3 mice per time point).

## Appendix Figure S2

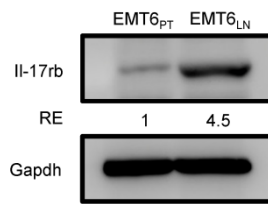

### Appendix Figure S2. IL-17rb expression in EMT6<sub>PT</sub> and EMT6<sub>LN</sub> cells.

IL-17rb expression in EMT6<sub>PT</sub> and EMT6<sub>LN</sub> cells were examined by Western blotting analysis. The intensity of each band was quantified using the Image J software, and Gapdh was used as a loading control. Relative expression (RE) of IL-17rb levels in EMT6<sub>LN</sub> cells to EMT6<sub>PT</sub> cells is indicated.

### Appendix Figure S3

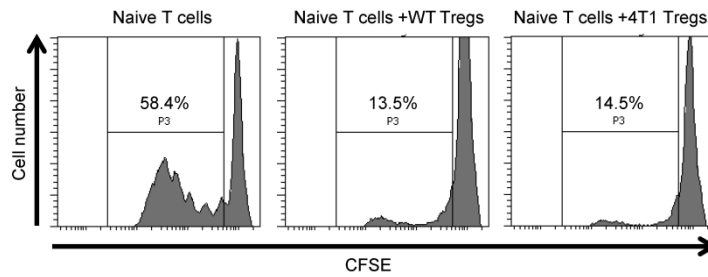

**Appendix Figure S3. Tregs isolated from inguinal LNs in 4T1 tumor-bearing mice exhibit similar T cell suppressive activity to Tregs isolated from WT mice.**

Tregs ( $CD4^{+}CD25^{+}GITR^{+}$  cells) were isolated from the inguinal LNs of WT mice (WT Tregs) and from the 4T1 tumor-bearing mice at the third week after initial injection (4T1 Tregs) by FACS sorting.  $5 \times 10^4$  Tregs were then co-cultured with  $1 \times 10^5$  CFSE-labeled  $CD3^{+}$  T cells (naive T cells) from WT mice in the 96-well U bottom plate pre-coated with anti-mouse CD3 Abs and anti-mouse CD28 Abs. Five days later, the percentage of proliferating CFSE-labeled  $CD3^{+}$  T cells were analyzed by FACS.

## Appendix Figure S4

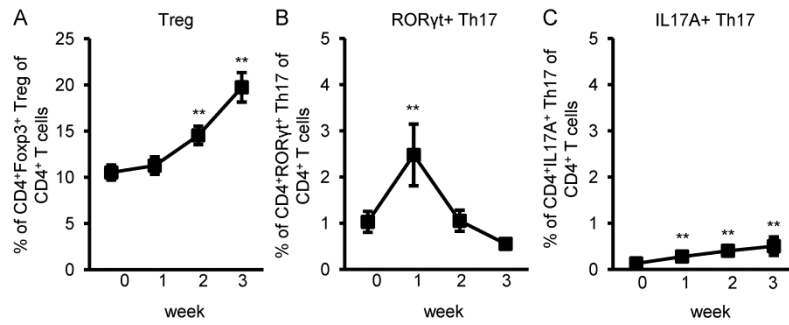

### Appendix Figure S4. Percentage of Tregs and Th17 cells in inguinal LN of 4T1 tumor-bearing mice.

Percentage of CD4<sup>+</sup>Foxp3<sup>+</sup> Tregs (A), CD4<sup>+</sup>RORγt<sup>+</sup> Th17 cells (B), or CD4<sup>+</sup>IL-17A<sup>+</sup> Th17 cells (C) of total CD4<sup>+</sup> cells in inguinal LN of BALB/c mice injected with 4T1 cells was analyzed by FACS.

Data information: All values are presented as mean  $\pm$  SD (n = 4 mice per group). In (A), \*\*P = 0.0017 and \*\*P = 0.0001 for the percentage of CD4<sup>+</sup>Foxp3<sup>+</sup> Tregs at week 2 and week 3, respectively. In (B), \*\*P = 0.0012 for the percentage of CD4<sup>+</sup>RORγt<sup>+</sup> Th17 cells at week 1. In (C), \*\*P = 0.0054, \*\*P = 0.0012, and \*\*P = 0.0109 for the percentage of CD4<sup>+</sup>IL-17A<sup>+</sup> Th17 cells at week 1, 2, and 3, respectively. Level of significance was determined using two-tailed unpaired t-test.

## Appendix Figure S5

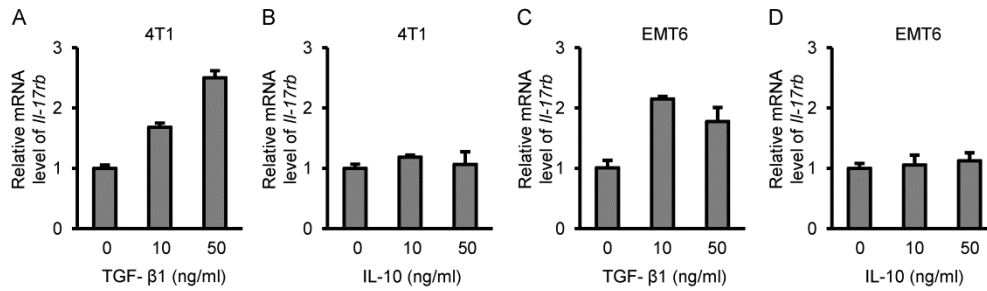

### Appendix Figure S5. TGF- $\beta$ 1, but not IL-10, induces *IL-17rb* expression in 4T1 and EMT6 breast cancer cells.

RT-qPCR analysis of *IL-17rb* in 4T1 cells (A and B) or EMT6 cells (C and D) treated with recombinant TGF- $\beta$ 1 (A and C) or IL-10 (B and D) for 4 hours. Gapdh was used as internal control.

Data information: All experimental data were verified in at least two independent experiments. Data were presented as means  $\pm$  SD (triplicate measurement).

## Appendix Figure S6

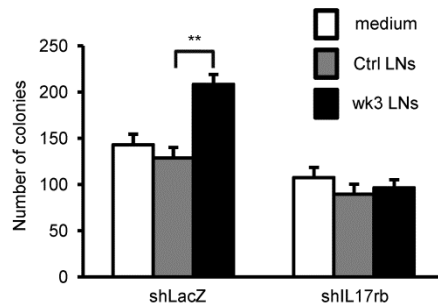

### Appendix Figure S6. Depletion of IL-17rb abolishes the colony forming ability induced by the tumor-draining LNs.

4T1-injected BALB/c mice were sacrificed at the third week after initial injection. Total cells isolated from inguinal lymph node tissues were co-cultured with shLacZ or shIL-17rb 4T1 cells in a transwell plate ( $5 \times 10^2$  cells/well,  $n = 6$  wells per group). Inguinal lymph node tissues from un-injected BALB/c mice were used as a control. After 5-day co-culture, the colony forming ability of 4T1 cells at lower wells was examined in soft agar.

Data information: Data were presented as means  $\pm$  SD. ( $n = 6$  wells per group,  $^{**}P = 0.0000012$ ). Level of significance was determined using two-tailed unpaired t-test.

### Appendix Figure S7

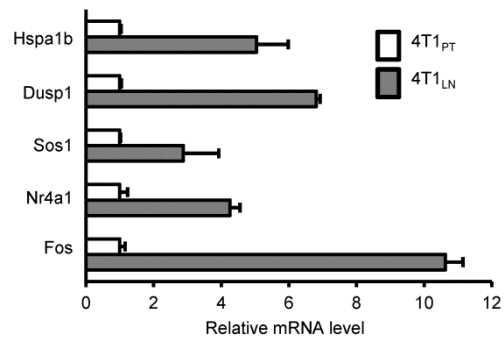

**Appendix Figure S7. Gene expression of *Fos*, *Nr4a1*, *Sos1*, *Dusp1*, and *Hspa1b* involved in MAPK signaling pathway is increased in 4T1<sub>LN</sub> cells.**

mRNA expression of each candidate gene in 4T1<sub>PT</sub> and 4T1<sub>LN</sub> cells was determined by RT-qPCR. Gapdh was used as an internal control.

Data information: Data were presented as means  $\pm$  SD (triplicate measurement).

**Appendix Table S1. KEGG pathway enrichment analysis of the up-regulated genes in 4T1<sub>LN</sub> cells.**

| Term                        | <i>P</i> value | Genes                                        |
|-----------------------------|----------------|----------------------------------------------|
| MAPK signaling pathway      | 0.033          | Fgf16,Fos,Nr4a1,Sos1,Dusp1,<br>Hspa1b        |
| PI3K-Akt signaling pathway  | 0.038          | Fgf16,Nr4a1,Tnxb,Sos1,Cdc37,<br>Itga10,Thbs2 |
| Prolactin signaling pathway | 0.095          | Fos, Sos1, Socs3                             |

**Appendix Table S2. KEGG pathway enrichment analysis of the down-regulated genes in shIL-17RB MDA-MB-361 cells.**

| Term                                    | <i>P</i> value | Genes                                          |
|-----------------------------------------|----------------|------------------------------------------------|
| Transcriptional misregulation in cancer | 0.073          | DDIT3,ETV4,SUPT3H,ARNT2, MMP9                  |
| Pathways in cancer                      | 0.075          | MECOM,WNT3,ARNT2,FGF1, LAMA2,MMP1, MMP9,PDGFRB |
| MAPK signaling pathway                  | 0.091          | DDOT3,MECOM,DUSP4,FGF1, PDGFRB,PTPRR           |
| Staphylococcus aureus infection         | 0.091          | C1R,C5,HLA-DRA                                 |
| Legionellosis                           | 0.091          | CXCL2,CXCL3,EEF1A2                             |

**Appendix Table S3. Primers used in this study.**

**a. Primer sequence for real-time PCR.**

| Gene    | Forward                      | Reverse                       |
|---------|------------------------------|-------------------------------|
| Il-17rb | 5'-tggtctatcttgggggagca-3'   | 5'-aaagctgtggcgtccttcac-3'    |
| Cd300Ig | 5'-gaccgtgatcatgagggacc-3'   | 5'-accaggagaagctggaaagac-3'   |
| Gpr56   | 5'-ctgcctgggctctatctact-3'   | 5'-ctgggtctctgggtaagagt-3'    |
| Scara5  | 5'-gttccatgatcgctgttggg-3'   | 5'-ccaaatcctcctgtgcctt-3'     |
| Oprk1   | 5'-caagtgccaccttctcgtt-3'    | 5'-ctgtcggattctgccagtt-3'     |
| GAPDH   | 5'-cttggcattgtggaagggc-3'    | 5'-cagggatgatgttctgggca-3'    |
| Hspa1b  | 5'-caccatcgaggaggtggattag-3' | 5'-ttgacagtaatcgggtgccccaa-3' |
| Dusp1   | 5'-gcttgacacaccaccagta-3'    | 5'-cagaccaccgacctacacaa-3'    |
| Sos1    | 5'-agccagtgcagcaaaactg-3'    | 5'-ggaactcccttgtgagcca-3'     |
| Nr4a1   | 5'-gagttcggcaagcctaccat-3'   | 5'-ggtgtcaaactctccggtgt-3'    |
| Fos     | 5'-tactaccattccccagccga-3'   | 5'-gctgtcaccgtggggataaa-3'    |

**b. Primers used for the cloning of Il-17rb into pLAS5w.Pbsd-L-tRFP-C vector.**

| Gene    | Forward                              | Reverse                              |
|---------|--------------------------------------|--------------------------------------|
| Il-17rb | 5'-gatcttcgaaatgttgctagtgttgctgat-3' | 5'-aagcgctagcctacaagggtgaacagctat-3' |

**c. Primers used for the detection of chromosomal deletions of Il-17rb.**

|        | Forward                     | Reverse                    |
|--------|-----------------------------|----------------------------|
| Primer | 5'-actctgactgcttgtgtttgt-3' | 5'-tggtccggaaacaggagtat-3' |

**d. Primer used for the sequencing analysis of chromosomal deletions of Il-17rb.**

|        | Forward                   | Reverse                      |
|--------|---------------------------|------------------------------|
| Primer | 5'-gattccttttgccttgggc-3' | 5'-tgaacaggtgatggaacaggag-3' |
